# Supplementary material for: Biological fate of food nanoemulsions and the nutrients they carry – internalisation, transport and cytotoxicity of edible nanoemulsions in Caco-2 intestinal cells
Source: Royal Society of Chemistry journal article supplement (doi:10.1039/c7ra07804h), 2017-01-01
Supplement: c7ra07804h1.pdf [file c7ra07804h1.pdf]

**TI: Biological fate of food nanoemulsions and the nutrients they carry** - Internalisation, transport and cytotoxicity of edible nanoemulsions in Caco-2 intestinal cells

**AU: Tim J. Wooster<sup>1#</sup>, Sean C. Moore<sup>1</sup>, Wei Chen<sup>2</sup>, Helen Andrews<sup>1</sup>, Rama Addepalli<sup>2</sup>, Robert B. Seymour<sup>2</sup> and Simone A. Osborne<sup>2#</sup>**

**Supplemental Table 1:** Fatty acid composition of canola oil (Crisco) used in nanoemulsion formulations. Analysed by GC-FAME of base oil as per Sassene *et al.*<sup>54</sup>

| <b>Fatty Acid</b> | <b>Name</b> | <b>Content,<br/>g/100g</b> |
|-------------------|-------------|----------------------------|
| <C14:0            |             | ~1                         |
| C16:0             | Palmitic    | 4                          |
| C18:0             | Stearic     | 2                          |
| C18:1 n-9         | Oleic       | 56                         |
| C18:2 n-6         | Linoleic    | 26                         |
| C18:3 n-3         | Linolenic   | 10                         |
